# Supplementary material for: Scalable and green formation of graphitic nanolayers produces highly conductive pyrolyzed paper toward sensitive electrochemical sensors
Source: Royal Society of Chemistry journal article supplement (doi:10.1039/d2nr07080d), 2023-01-01
Supplement: d2nr07080d1.pdf [file d2nr07080d1.pdf]

Link to download Video S1: [Video S1.mp4](#)
